# Supplementary material for: Infection via mosquito bite alters Zika virus tissue tropism and replication kinetics in rhesus macaques
Source: PubMed Central journal article supplement (PMC5727388; doi:10.1038/s41467-017-02222-8), 2017-12-13
Supplement: 41467_2017_2222_MOESM1_ESM.pdf [file 41467_2017_2222_MOESM1_ESM.pdf]

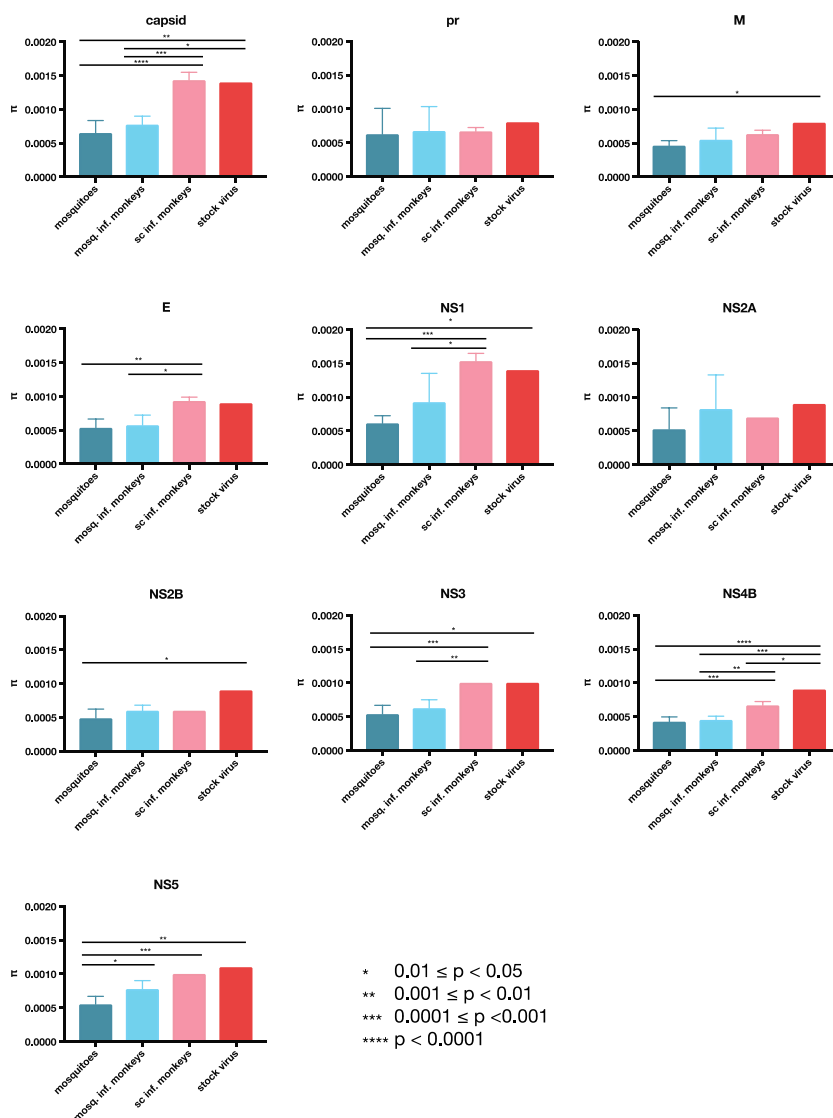

**Supplementary Figure 1. Genewise nucleotide diversity ( $\pi$ ) in viruses infecting monkeys and mosquitoes.** We calculated  $\pi$  for each viral gene (except for protein 2K and NS4A, which did not have sufficient coverage in some samples) in viruses infecting each experimental group. Bars indicate mean and error bars indicate standard deviation, which are measured for each experimental group. Asterisks indicate statistical significance (one-way ANOVA with Tukey's correction for multiple comparisons).

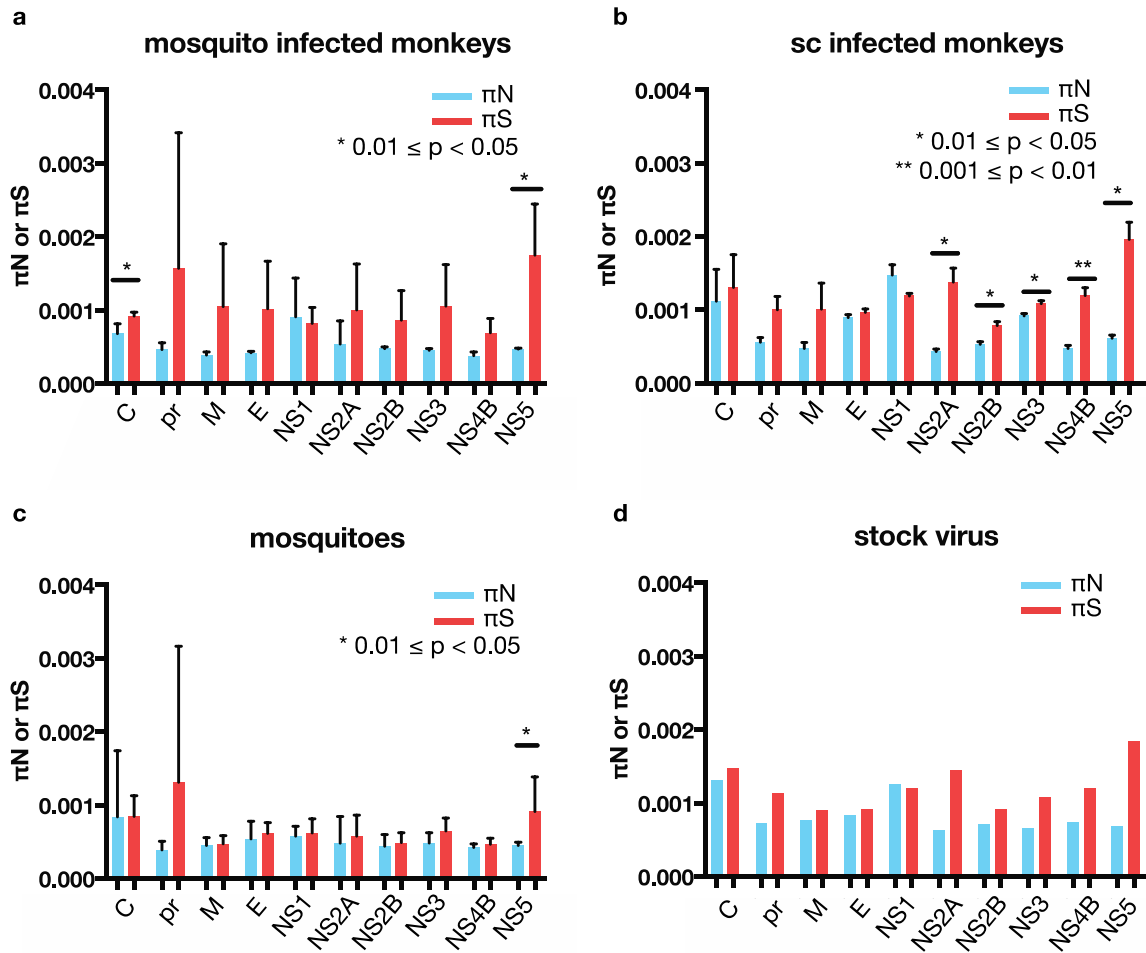

**Supplementary Figure 2. Genewise synonymous and nonsynonymous nucleotide diversity ( $\pi S$  and  $\pi N$ ) in viruses infecting monkeys and mosquitoes.** We calculated  $\pi S$  and  $\pi N$  for each viral gene (except for protein 2K and NS4A, which did not have sufficient coverage in some samples) in viruses infecting each experimental group. Bars indicate mean and error bars indicate standard deviation, which are measured for each experimental group. For each gene, we determined whether  $\pi S$  was significantly different from  $\pi N$  as a test of the strength and direction of natural selection. Asterisks indicate statistical significance (Student's paired t-test).

**Supplementary Table 1. ZIKV NS1-specific antibody measured by enzyme-linked immunosorbent assay (ELISA).**

| Infection Method | Animal ID | Semi-Quantitative IgM Titer (Average OD Ratio) |      |      |      |       |       |
|------------------|-----------|------------------------------------------------|------|------|------|-------|-------|
|                  |           | 0DPI                                           | 7DPI | 8DPI | 9DPI | 10DPI | 14DPI |
| Subcutaneous     | 634675    | nd                                             | nd   | nd   | nd   | nd    | 1.238 |
|                  | 566628    | nd                                             | nd   | nd   | nd   | nd    | 3.074 |
|                  | 311413    | nd                                             | nd   | nd   | nd   | nd    | 2.473 |
| Mosquito Bite    | 268283    | nd                                             | nd   | nd   | nd   | nd    | 4.270 |
|                  | 328696    | nd                                             | nd   | nd   | nd   | nd    | 2.025 |
|                  | 458001    | nd                                             | nd   | nd   | nd   | 1.321 | 3.074 |
|                  | 349332    | nd                                             | nd   | nd   | nd   | nd    | 2.424 |

**Supplementary Table 2. Nucleotide variants in ZIKV challenge stock used to infect rhesus macaques.**

| <b>Site relative to KU501215</b> | <b>Change</b> | <b>Amino Acid Change</b> | <b>Variant Frequency</b> |
|----------------------------------|---------------|--------------------------|--------------------------|
| 1964                             | G->T          | Val -> Leu               | 91.5%                    |
| 2780                             | T->G          | Trp -> Gly               | 5.8%                     |
| 3147                             | T->C          | Met -> Thr               | 10.2%                    |
| 5679                             | C->T          | Ser -> Phe               | 66.4%                    |
| 7915                             | C->T          | Synonymous               | 9.1%                     |

\*Only variants found in >5% of sequences in duplicate sequencing reactions are shown

**Supplementary Table 3. Total viral template numbers added to cDNA synthesis reaction in sequencing pipeline.**

| <b>Mosquito Saliva/Primate Plasma Sample</b> | <b>Day of Peak Viremia</b> | <b>Templates / cDNA Reaction in Replicate A</b> | <b>Templates / cDNA Reaction in Replicate B</b> |
|----------------------------------------------|----------------------------|-------------------------------------------------|-------------------------------------------------|
| Saliva-6                                     | -----                      | 426.8                                           | 345.3                                           |
| Saliva-8                                     | -----                      | 21868.0                                         | 21868.0                                         |
| Saliva-9                                     | -----                      | 10252.0                                         | 10252.0                                         |
| Saliva-19                                    | -----                      | 1496.0                                          | 1496.0                                          |
| Saliva-20                                    | -----                      | 368.7                                           | 368.7                                           |
| Saliva-25                                    | -----                      | 2477.2                                          | 2477.2                                          |
| Saliva-26                                    | -----                      | 43120.0                                         | 43120.0                                         |
| Saliva-32                                    | -----                      | 293.9                                           | 293.9                                           |
| 328696                                       | Day 5                      | 43273.2                                         | 43273.2                                         |
| 458001                                       | Day 5                      | 52852.9                                         | 52852.9                                         |
| 349332                                       | Day 5                      | 3501.5                                          | 3501.5                                          |
| 268283                                       | Day 6                      | 64744.7                                         | 64744.7                                         |
| 566628                                       | Day 3                      | 5597.6                                          | 5597.6                                          |
| 311413                                       | Day 3                      | 23123.1                                         | 23123.1                                         |
